# Supplementary material
Source: PubMed Central journal article supplement (PMC2546490)
Supplement: NIHMS62274-supplement-si20061212_051.pdf [file NIHMS62274-supplement-si20061212_051.pdf]

# Concentration Gradient Immunoassay II. Supplemental Information

*Jennifer O. Foley,<sup>1</sup> Kjell Nelson,<sup>1</sup> Afshin Mashadi-Hosseini,<sup>1</sup> Bruce A. Finlayson,<sup>2</sup> Paul Yager<sup>1\*</sup>*

<sup>1</sup> Department of Bioengineering, University of Washington, Seattle, WA 98195

<sup>2</sup> Department of Chemical Engineering, University of Washington, Seattle, WA 98195

\* To whom correspondence should be addressed: e-mail – [yagerp@u.washington.edu](mailto:yagerp@u.washington.edu)

## ABSTRACT

A finite element model of novel immunoassay – the concentration gradient immunoassay (CGIA)<sup>1</sup> – was developed. The governing equations, initial conditions, and boundary conditions for the model which was solved in COMSOL<sup>®</sup> are presented in detail. The model solves the Poisson and steady-state Navier-Stokes equations to describe the fluid flow in the microchannel. The convection-diffusion and surface reaction equations were solved simultaneously and describe the transport of the antibody, analyte, and antibody-analyte complex in solution and the binding reaction of the antibody to the immobilized analyte. A pseudo-3d model describes the assay from the inlet to 22 mm downstream and uses the Poisson equation to solve the velocity profile. A 3d model simulates the assay in the binding area (see Figure 1 in the primary manuscript).

**Table S-1.** List of variables.

| Variable                       | Description                                                         |
|--------------------------------|---------------------------------------------------------------------|
| $c_s$ (moles $m^{-2}$ )        | surface concentration of bound antibody                             |
| $c_{Ab}$ (M)                   | concentration of antibody in solution                               |
| $c_{Ag}$ (M)                   | concentration of analyte in solution                                |
| $c_{Ag-Ab}$ (M)                | concentration of antibody-analyte (complex) in solution             |
| $c_{Ab0}$ (M)                  | initial concentration of antibody in solution                       |
| $c_{Ag0}$ (M)                  | initial concentration of analyte in solution                        |
| $c_{Ag-Ab0}$ (M)               | initial concentration of antibody-analyte (complex) in solution     |
| $c_{s0}$ (moles $m^{-2}$ )     | initial surface concentration of bound antibody                     |
| $c_{Ag\ 22\ mm}$ (M)           | concentration of antigen 22 mm downstream of inlet                  |
| $c_{Ab\ 22\ mm}$ (M)           | concentration of analyte 22 mm downstream of inlet                  |
| $c_{Ag-Ab\ 22\ mm}$ (M)        | concentration of antibody-analyte complex 22 mm downstream of inlet |
| $k_{ads}$ ( $s^{-1}$ )         | binding rate of an antibody from solution to the surface            |
| $k_{des}$ ( $M^{-1}s^{-1}$ )   | dissociation rate of an antibody bound to the surface               |
| $\theta$ (moles $m^{-2}$ )     | available antibody binding sites per unit area                      |
| $\theta_0$ (moles $m^{-2}$ )   | total number of initial antibody binding sites per unit area        |
| $p$ ( $kg\ m^{-1}\ s^{-2}$ )   | pressure                                                            |
| $x_s$ (m)                      | characteristic length (the depth of channel)                        |
| $u$ ( $m\ s^{-1}$ )            | velocity in x-dimension                                             |
| $u_s$ ( $m\ s^{-1}$ )          | characteristic velocity (average velocity)                          |
| $u_0$ ( $m\ s^{-1}$ )          | parabolic inlet velocity for 3d model solved in pseudo-3d mode      |
| $v$ ( $m\ s^{-1}$ )            | velocity in y-dimension                                             |
| $w$ ( $m\ s^{-1}$ )            | velocity in z-dimension                                             |
| $\rho$ ( $kg\ m^{-3}$ )        | density                                                             |
| $\mu$ ( $kg\ m^{-1}\ s^{-1}$ ) | viscosity                                                           |
| $D$ ( $m^2\ s^{-1}$ )          | diffusion coefficient                                               |

**A) Poisson equation**

Solves the pseudo-3d velocity.

|                                                                                          |        |
|------------------------------------------------------------------------------------------|--------|
| $-\nabla \cdot (\nabla \mathbf{u}) = \left( \frac{\partial p}{\partial x} \right) / \mu$ | Eqn(1) |
|------------------------------------------------------------------------------------------|--------|

**B) Navier-Stokes Equation<sup>2</sup>**

|                         |                                                                                                                               |        |
|-------------------------|-------------------------------------------------------------------------------------------------------------------------------|--------|
| Navier-Stokes equation* | $\rho \frac{\partial \mathbf{u}}{\partial t} + \rho \mathbf{u} \cdot \nabla \mathbf{u} = -\nabla p + \mu \nabla^2 \mathbf{u}$ | Eqn(2) |
| Reynolds number         | $Re = \frac{\rho u x_s}{\mu}$                                                                                                 | Eqn(3) |

\* At this size scale, gravitational effects are negligible and the gravity term drops out of the Navier-Stokes equation.

| Boundary conditions |                                    |                     |                                |
|---------------------|------------------------------------|---------------------|--------------------------------|
| Wall                | Slip plane                         | Inlet               | Outlet                         |
| $\mathbf{u} = 0;$   | $\mathbf{n} \cdot \mathbf{u} = 0;$ | $\mathbf{u} = u_0;$ | Normal outflow;<br>$v=0, w=0;$ |

**C) Convection-diffusion equations governing reaction and transport in the solution**

Reaction between antibody and analyte in solution

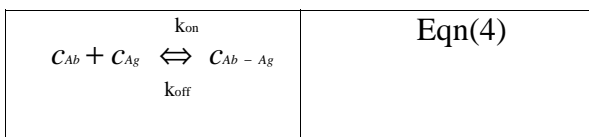

Convection-diffusion equations for each species<sup>2</sup>

|                                                                                                                       |        |
|-----------------------------------------------------------------------------------------------------------------------|--------|
| $\frac{dc_{Ab}}{dt} + \nabla \cdot (-D \nabla c_{Ab} + c_{Ab} \mathbf{u}) = k_{off} c_{Ag-Ab} - k_{on} c_{Ab} c_{Ag}$ | Eqn(5) |
| $\frac{dc_{Ag}}{dt} + \nabla \cdot (-D \nabla c_{Ag} + c_{Ag} \mathbf{u}) = k_{off} c_{Ag-Ab} - k_{on} c_{Ab} c_{Ag}$ | Eqn(6) |

|                                                                                                                                   |        |
|-----------------------------------------------------------------------------------------------------------------------------------|--------|
| $\frac{dc_{Ag - Ab}}{dt} + \nabla \cdot (-D\nabla c_{Ag - Ab} + c_{Ag - Ab}\mathbf{u}) = k_{on}c_{Ab}c_{Ag} - k_{off}c_{Ag - Ab}$ | Eqn(7) |
|-----------------------------------------------------------------------------------------------------------------------------------|--------|

Peclet number for each species<sup>2</sup>

|                                              |         |
|----------------------------------------------|---------|
| $Pe_{Ab} = \frac{x_s u_s}{D_{Ab}}$           | Eqn(8)  |
| $Pe_{Ag} = \frac{x_s u_s}{D_{Ag}}$           | Eqn(9)  |
| $Pe_{Ag - Ab} = \frac{x_s u_s}{D_{Ag - Ab}}$ | Eqn(10) |

|                                                                 |                 |                    |
|-----------------------------------------------------------------|-----------------|--------------------|
| Initial conditions for pseudo-3d model (at inlet of the device) |                 |                    |
| $c_{Ab0} = X *$                                                 | $c_{Ag0} = Y *$ | $c_{Ag - Ab0} = 0$ |

\*where X and Y are arbitrary concentrations.

|                                         |                                                                       |
|-----------------------------------------|-----------------------------------------------------------------------|
| Boundary conditions for pseudo-3d model |                                                                       |
|                                         | Wall/Plane of symmetry                                                |
| Antibody                                | $\mathbf{n} \cdot (-D\nabla c_{Ab} + c_{Ab}\mathbf{u}) = 0$           |
| Analyte                                 | $\mathbf{n} \cdot (-D\nabla c_{Ag} + c_{Ag}\mathbf{u}) = 0$           |
| Antibody-<br>Analyte complex            | $\mathbf{n} \cdot (-D\nabla c_{Ag - Ab} + c_{Ag - Ab}\mathbf{u}) = 0$ |

|                                     |               |                    |
|-------------------------------------|---------------|--------------------|
| Initial conditions for the 3d model |               |                    |
| $c_{Ab0} = 0$                       | $c_{Ag0} = 0$ | $c_{Ag - Ab0} = 0$ |

| Boundary conditions for the 3d model |                                                                       |                                   |                                                         |                                                                                                                        |
|--------------------------------------|-----------------------------------------------------------------------|-----------------------------------|---------------------------------------------------------|------------------------------------------------------------------------------------------------------------------------|
|                                      | Wall/Slip plane                                                       | Inlet                             | Outlet                                                  | Binding Surface                                                                                                        |
| Antibody                             | $\mathbf{n} \cdot (-D\nabla c_{Ab} + c_{Ab}\mathbf{u}) = 0$           | $c_{Ab} = c_{Ab\ 22mm}$           | $\mathbf{n} \cdot (-D_{Ab}\nabla c_{Ab}) = 0$           | $\mathbf{n} \cdot (-D\nabla c_{Ab} + c_{Ab}\mathbf{u}) = N_0$ ;<br>$N_0 = -k_{ads}c_{Ab}(\theta_0 - c_s) + k_{des}c_s$ |
| Analyte                              | $\mathbf{n} \cdot (-D\nabla c_{Ag} + c_{Ag}\mathbf{u}) = 0$           | $c_{Ag} = c_{Ag\ 22mm}$           | $\mathbf{n} \cdot (-D_{Ag}\nabla c_{Ag}) = 0$           | $\mathbf{n} \cdot (-D\nabla c_{Ag} + c_{Ag}\mathbf{u}) = 0$                                                            |
| Antibody-<br>Analyte<br>complex      | $\mathbf{n} \cdot (-D\nabla c_{Ag - Ab} + c_{Ag - Ab}\mathbf{u}) = 0$ | $c_{Ag - Ab} = c_{Ag - Ab\ 22mm}$ | $\mathbf{n} \cdot (-D_{Ag - Ab}\nabla c_{Ag - Ab}) = 0$ | $\mathbf{n} \cdot (-D\nabla c_{Ag - Ab} + c_{Ag - Ab}\mathbf{u}) = 0$                                                  |

### **D) Surface reaction**

Dimensional form of the reaction equation is described in the primary manuscript.

| Initial conditions                                 |              |
|----------------------------------------------------|--------------|
| $\theta_0 = 1$ binding site every $25\text{ nm}^2$ | $c_{s0} = 0$ |

### REFERENCES

- (1) Nelson, K., Foley, J., and P. Yager. *submitted to Anal. Chem.*
- (2) Bird, R. B., Stewart, W.E., Lightfoot, E.N. *Transport Phenomena*, 2nd ed.; Wiley Publishing: New York, NY, 2002.
